# Supplementary material for: Systematic identification of intron retention associated variants from massive publicly available transcriptome sequencing data
Source: PubMed Central journal article supplement (PMC9522810; doi:10.1038/s41467-022-32887-9), 2022-09-29
Supplement: 41467_2022_32887_MOESM3_ESM.pdf [file 41467_2022_32887_MOESM3_ESM.pdf]

## Description of Additional Supplementary Files

File Name: Supplementary Data 1

Description: List of TCGA samples used in this study and the frequencies of their IRAVs.

File Name: Supplementary Data 2

Description: List of IRAVs affecting cancer-related genes (those registered in Cancer Gene Census) identified in TCGA samples.

File Name: Supplementary Data 3

Description: List of putative pathogenic IRAVs.

File Name: Supplementary Data 4

Description: List of IRAVs related to drug response.
